# Supplementary material for: Bis(isothiocyanato)bis(phosphine) complexes of group 10 metals: reactivity toward organic isocyanides
Source: Royal Society of Chemistry journal article supplement (doi:10.1039/b508134c), 2005-01-01
Supplement: b508134c.pdf [file b508134c.pdf]

## Supporting Information

### **Bis(isothiocyanato)bis(phosphine) complexes of group 10 metals: reactivity toward organic isocyanides**

Xiaohong Chang<sup>a</sup>, Kyung-Eun Lee<sup>a</sup>, Sang Il Jeon<sup>a</sup>, Yong-Joo Kim,<sup>\*a</sup> H. -K Lee<sup>b</sup> and  
Soon W. Lee<sup>b</sup>

<sup>a</sup>Department of Chemistry, Kangnung National University, Kangnung 210-702, Korea

<sup>b</sup>Department of Chemistry, Sungkyunkwan University, Natural Science Campus, Suwon  
440-746, Korea

## Experimental

**Data for Ni(NCS)<sub>2</sub>(CN-C<sub>6</sub>H<sub>3</sub>-2,6-Me<sub>2</sub>)(PMe<sub>2</sub>Ph)<sub>2</sub>, (1):**  $\nu_{\max}/\text{cm}^{-1}$  2136 (N≡C), 2072 (NCS);  $\delta_{\text{H}}$  (300 MHz in CDCl<sub>3</sub>): 1.90 (s, 12H, P(CH<sub>3</sub>)<sub>2</sub>Ph), 1.93 (s, 6H, CH<sub>3</sub>), 6.96 (d,  $J$  = 7.9 Hz, Ph), 7.11–7.16 (m, 1H, Ph), 7.44–7.73 (m, 6H, Ph), 7.74–7.75 (m, 4H, Ph);  $\delta_{\text{C}}$  (CDCl<sub>3</sub>): 12.9 (s, P(CH<sub>3</sub>)<sub>2</sub>Ph), 18.4 (s, CH<sub>3</sub>), 126.5, 128.0, 129.1, 129.7, 130.3, 131.1, 132.1 (s, NCS), 132.7, 135.1, 141.0 (S, Ph). The CNR carbon atom could not be assigned because of its low intensity.  $\delta_{\text{P}}$  (CDCl<sub>3</sub>) 11.0 (s).

**Data for Ni(NCS)<sub>2</sub>(CN-*t*-Bu)(PMe<sub>2</sub>Ph)<sub>2</sub>, (2):**  $\nu_{\max}/\text{cm}^{-1}$  2186 (N≡C), 2093, 2078 (NCS);  $\delta_{\text{H}}$  (300 MHz in CDCl<sub>3</sub>): 1.06 (s, 9H, C(CH<sub>3</sub>)<sub>3</sub>), 1.86 (s, 12H, P(CH<sub>3</sub>)<sub>2</sub>Ph), 7.50–7.54 (m, 6H, Ph), 7.79–7.83 (m, 4H, Ph). );  $\delta_{\text{C}}$  (CDCl<sub>3</sub>) 13.0 (br, P(CH<sub>3</sub>)<sub>2</sub>Ph), 29.6 (s, CH<sub>3</sub>), 59.3 (s, C(CH<sub>3</sub>)<sub>3</sub>), 129.1, 130.5, 131.1, 132.7 (s, NCS), 139.5 (s, Ph);  $\delta_{\text{P}}$  (CDCl<sub>3</sub>) 14.4 (s).

**Data for [Ni(P(*n*-Pr)<sub>3</sub>)<sub>2</sub>(CN-*t*-Bu)<sub>3</sub>]<sup>2+</sup>[Ni(1,3- $\mu$ -NCS)(NCS)<sub>3</sub>]<sub>2</sub><sup>2-</sup>, (3) ·(4):**  $\mu_{\text{eff}} = 2.71 \mu_{\text{B}}$ .  $\nu_{\max}/\text{cm}^{-1}$  2168 (N≡C), 2074 (NCS);  $\delta_{\text{H}}$  (300 MHz in CDCl<sub>3</sub>) 1.14 (t,  $J = 7.0$  Hz, 18H, P(CH<sub>2</sub>CH<sub>2</sub>CH<sub>3</sub>)<sub>3</sub>), 1.60 (s, 27H, C(CH<sub>3</sub>)<sub>3</sub>), 1.64 (br, P(CH<sub>2</sub>CH<sub>2</sub>CH<sub>3</sub>)<sub>3</sub>), 1.92 (br, P(CH<sub>2</sub>CH<sub>2</sub>CH<sub>3</sub>)<sub>3</sub>);  $\delta_{\text{P}}$  (CDCl<sub>3</sub>) 24.9 (br).

**Data for [Ni(P(*n*-Pr)<sub>3</sub>)<sub>2</sub>(CN-*t*-Bu)<sub>2</sub>](SCN)<sub>2</sub>:**  $\mu_{\text{eff}} = 0.98 \mu_{\text{B}}$ .  $\nu_{\max}/\text{cm}^{-1}$  2167 (N≡C), 2098, 2047 (NCS);  $\delta_{\text{H}}$  (300 MHz in CDCl<sub>3</sub>) 1.14 (t,  $J = 7.1$  Hz, 18H, P(CH<sub>2</sub>CH<sub>2</sub>CH<sub>3</sub>)<sub>3</sub>), 1.57 (s, 18H, C(CH<sub>3</sub>)<sub>3</sub>), 1.68 (br, P(CH<sub>2</sub>CH<sub>2</sub>CH<sub>3</sub>)<sub>3</sub>), 1.82 (br, P(CH<sub>2</sub>CH<sub>2</sub>CH<sub>3</sub>)<sub>3</sub>);  $\delta_{\text{P}}$  (CDCl<sub>3</sub>) 24.1 (br).

**Data for Pd(NCS)(SCN)(CN-*t*-Bu)(P(*n*-Pr)<sub>3</sub>), (5):**  $\nu_{\max}/\text{cm}^{-1}$  2218 (N≡C), 2096, 2064 (NCS).  $\delta_{\text{H}}$  (300 MHz in CDCl<sub>3</sub> at -60 °C) 1.14 (t,  $J = 7.0$  Hz, 9H, P(CH<sub>2</sub>CH<sub>2</sub>CH<sub>3</sub>)<sub>3</sub>),

1.61 (br, 6H, P(CH<sub>2</sub>CH<sub>2</sub>CH<sub>3</sub>)<sub>3</sub>), 1.72 (s, 9H, C(CH<sub>3</sub>)<sub>3</sub>), 2.15 (br, 6H, P(CH<sub>2</sub>CH<sub>2</sub>CH<sub>3</sub>)<sub>3</sub>);  
δ<sub>C</sub> (CDCl<sub>3</sub>) 15.9 (d, *J* = 17 Hz, P(CH<sub>2</sub>CH<sub>2</sub>CH<sub>3</sub>)<sub>3</sub>), 16.8 (d, 137.7 Hz, P(CH<sub>2</sub>CH<sub>2</sub>CH<sub>3</sub>)<sub>3</sub>),  
26.6 (br, P(CH<sub>2</sub>CH<sub>2</sub>CH<sub>3</sub>)<sub>3</sub>), 29.4 (s, C(CH<sub>3</sub>)<sub>3</sub>), 60.9 (s, C(CH<sub>3</sub>)<sub>3</sub>), 129.9 (s, NCS). The  
CNR carbon atom could not be assigned because of its too low intensity. δ<sub>P</sub> (CDCl<sub>3</sub>)  
12.4 (s).

**Data for {Pd(CN-*i*-Pr)<sub>2</sub>[P(*n*-Pr)<sub>3</sub>]<sub>2</sub>}(SCN)<sub>2</sub> (6):** ν<sub>max</sub>/cm<sup>-1</sup> 2224 (N≡C), 2096, 2052  
(NCS); δ<sub>H</sub> (300 MHz in CDCl<sub>3</sub>) 1.13 (t, *J* = 7.1 Hz, 18H, P(CH<sub>2</sub>CH<sub>2</sub>CH<sub>3</sub>)<sub>3</sub>), 1.53 (d, *J* =  
6.6 Hz, 12H, CH(CH<sub>3</sub>)<sub>2</sub>), 1.63 (m, 12H, P(CH<sub>2</sub>CH<sub>2</sub>CH<sub>3</sub>)<sub>3</sub>), 2.08 (m, 12H,  
P(CH<sub>2</sub>CH<sub>2</sub>CH<sub>3</sub>)<sub>3</sub>), 4.46 (sep, *J* = 6.6 Hz, CH(CH<sub>3</sub>)<sub>3</sub>); δ<sub>C</sub> (CDCl<sub>3</sub>) 15.8 (t, *J* = 7.2 Hz,  
P(CH<sub>2</sub>CH<sub>2</sub>CH<sub>3</sub>)<sub>3</sub>), 17.9 (s, P(CH<sub>2</sub>CH<sub>2</sub>CH<sub>3</sub>)<sub>3</sub>), 22.6 (s, CH(CH<sub>3</sub>)<sub>2</sub>), 26.6 (t, *J* = 14 Hz,  
P(CH<sub>2</sub>CH<sub>2</sub>CH<sub>3</sub>)<sub>3</sub>), 48.8 (s, CH(CH<sub>3</sub>)<sub>2</sub>), 132.5 (s, NCS). The CNR carbon atom could not  
be assigned because of its low intensity. δ<sub>P</sub> (CDCl<sub>3</sub>) 15.7 (s).

**Data for [Pd(CN-*t*-Bu)<sub>2</sub>(PMe<sub>3</sub>)<sub>2</sub>](SCN)<sub>2</sub> (7):** ν<sub>max</sub>/cm<sup>-1</sup> 2227 (N≡C), 2047 (NCS); δ<sub>H</sub>  
1.56 (s, 18H, P(CH<sub>3</sub>)<sub>3</sub>), 1.75 (br, 18H, C(CH<sub>3</sub>)<sub>3</sub>); δ<sub>C</sub> (DMSO-d<sub>6</sub>) 14.9 (br, P(CH<sub>3</sub>)<sub>3</sub>),  
28.9 (s, C(CH<sub>3</sub>)<sub>3</sub>), 60.3 (s, C(CH<sub>3</sub>)<sub>3</sub>); δ<sub>P</sub> (DMSO-d<sub>6</sub>): -7.31 (s).

**Data for [Pd(CN-*t*-Bu)<sub>2</sub>(PMePh<sub>2</sub>)<sub>2</sub>](SCN)<sub>2</sub> (8);**  $\nu_{\max}/\text{cm}^{-1}$  2229 (N≡C), 2068 (NCS);  $\delta_{\text{H}}$  (300 MHz in CDCl<sub>3</sub>) 0.97 (s, 18H, C(CH<sub>3</sub>)), 2.56 (s, 6H, PCH<sub>3</sub>Ph<sub>2</sub>), 7.56–7.63 (m, 12H, Ph), 7.82–7.87 (m, 8H, Ph);  $\delta_{\text{C}}$  (CDCl<sub>3</sub>) 14.6 (br, PCH<sub>3</sub>Ph<sub>2</sub>), 29.2 (s, C(CH<sub>3</sub>)<sub>3</sub>), 59.5 (s, C(CH<sub>3</sub>)<sub>3</sub>), 129.2, 129.5, 130.7, 132.0, 132.4(s, Ph);  $\delta_{\text{P}}$  (CDCl<sub>3</sub>) 7.29 (s).

**Data for [Pd(CN-*i*-Pr)<sub>2</sub>(PMe<sub>3</sub>)<sub>2</sub>](SCN)<sub>2</sub> (9);**  $\nu_{\max}/\text{cm}^{-1}$  2229 (N≡C), 2054 (NCS);  $\delta_{\text{H}}$  (300 MHz in CDCl<sub>3</sub>) 1.57 (d,  $J = 6.6$  Hz, 12H, CH(CH<sub>3</sub>)<sub>2</sub>), 1.89 (s, 18H, P(CH<sub>3</sub>)<sub>3</sub>), 4.44 (sep,  $J = 6.6$  Hz, CH(CH<sub>3</sub>)<sub>2</sub>);  $\delta_{\text{C}}$  (CDCl<sub>3</sub>) 16.0 (br, P(CH<sub>3</sub>)<sub>3</sub>), 22.5 (s, C(CH<sub>3</sub>)<sub>2</sub>), 50.4 (s, C(CH<sub>3</sub>)<sub>2</sub>), 129.9 (NCS);  $\delta_{\text{P}}$  (CDCl<sub>3</sub>) -9.12 (s).

**Data for [Pd(CN-C<sub>6</sub>H<sub>3</sub>-2,6-Me<sub>2</sub>)<sub>2</sub>(PMePh<sub>2</sub>)<sub>2</sub>](SCN)<sub>2</sub> (10);**  $\nu_{\max}/\text{cm}^{-1}$  2189 (N≡C), 2070 (NCS);  $\delta_{\text{H}}$  (300 MHz in CDCl<sub>3</sub>) 2.12 (s, 12H, CH<sub>3</sub>), 2.51 (s, 6H, PCH<sub>3</sub>Ph<sub>2</sub>), 6.99 (br, 4H, Ph), 7.13–7.18 (m, 2H, Ph), 7.39–7.43 (m, 12H, Ph), 7.73–7.76 (m, 8H, Ph);  $\delta_{\text{C}}$  (CDCl<sub>3</sub>) 13.5 (br, PCH<sub>3</sub>Ph<sub>2</sub>), 18.6 (s, CH<sub>3</sub>), 125.5, 127.8, 129.1, 129.7, 131.0, 131.5, 132.5, 135.2 (s, Ph. );  $\delta_{\text{P}}$  (CDCl<sub>3</sub>) 10.7 (s).

**Data for [Pt(CN-C<sub>6</sub>H<sub>3</sub>-2,6-Me<sub>2</sub>)<sub>2</sub>(PMe<sub>3</sub>)<sub>2</sub>](SCN)<sub>2</sub>, (11);**  $\nu_{\max}/\text{cm}^{-1}$  2192 (N≡C), 2051 (NCS);  $\delta_{\text{H}}$  (300 MHz in CDCl<sub>3</sub>) 2.09 (t,  $J = 3.8$  Hz,  $J_{\text{PtH}} = 27$  Hz, 18H, P(CH<sub>3</sub>)<sub>3</sub>), 2.58 (s,

12 H, CH<sub>3</sub>), 7.18–7.21 (m, 4H, Ph), 7.29–7.36 (m, 2H, Ph);  $\delta_{\text{C}}$  (CDCl<sub>3</sub>) 15.9 (t,  $J = 19$  Hz, P(CH<sub>3</sub>)<sub>3</sub>), 19.1 (s, CH<sub>3</sub>), 125.0, 128.6, 130.8 (s, NCS), 131.1, 136.2 (s, Ph. );  $\delta_{\text{P}}$  (CDCl<sub>3</sub>) –22.8 (s,  $J_{\text{PtP}} = 1996$  Hz).

**Data for [Pt(CN–C<sub>6</sub>H<sub>3</sub>-2,6-Me<sub>2</sub>)<sub>2</sub>(PEt<sub>3</sub>)<sub>2</sub>](SCN)<sub>2</sub>, (12):**  $\nu_{\text{max}}/\text{cm}^{-1}$  2189 (N≡C), 2071, 2052 (NCS);  $\delta_{\text{H}}$  (300 MHz in CDCl<sub>3</sub>) 1.26 (m, 18H, P(CH<sub>2</sub>CH<sub>3</sub>)<sub>3</sub>), 2.27 (m, 12H, P(CH<sub>2</sub>CH<sub>3</sub>)<sub>3</sub>), 2.51 (s, 12H, CH<sub>3</sub>), 7.19–7.21 (m, 4H, Ph), 7.29–7.35 (m, 2H, Ph);  $\delta_{\text{C}}$  (CDCl<sub>3</sub>) 8.09 (s, P(CH<sub>2</sub>CH<sub>3</sub>)<sub>3</sub>), 16.5 (t,  $J = 17$  Hz, P(CH<sub>2</sub>CH<sub>3</sub>)<sub>3</sub>), 18.9 (s, CH<sub>3</sub>), 117.8, 128.5, 130.6 (br, NCS), 135.4 (s, Ph);  $\delta_{\text{P}}$  (CDCl<sub>3</sub>) 16.3 (s,  $J_{\text{PtP}} = 1974$  Hz).

**Data for [Pt(CN–C<sub>6</sub>H<sub>3</sub>-2,6-Me<sub>2</sub>)<sub>2</sub>(P(*n*-Pr)<sub>3</sub>)<sub>2</sub>](SCN)<sub>2</sub>, (13):**  $\nu_{\text{max}}/\text{cm}^{-1}$  2194 (N≡C), 2048 (NCS);  $\delta_{\text{H}}$  (300 MHz in CDCl<sub>3</sub>) 1.08 (t,  $J = 7.2$  Hz, 18H, P(CH<sub>2</sub>CH<sub>2</sub>CH<sub>3</sub>)<sub>3</sub>), 1.68 (m, 12H, P(CH<sub>2</sub>CH<sub>2</sub>CH<sub>3</sub>)<sub>3</sub>), 2.18 (m, 12H, P(CH<sub>2</sub>CH<sub>2</sub>CH<sub>3</sub>)<sub>3</sub>), 2.50 (s, 12H, CH<sub>3</sub>), 7.18 (d,  $J = 7.7$  Hz, 4H, Ph), 7.27–7.32 (m, 2H, Ph);  $\delta_{\text{C}}$  (CDCl<sub>3</sub>) 15.8 (t,  $J = 7.4$  Hz, P(CH<sub>2</sub>CH<sub>2</sub>CH<sub>3</sub>)<sub>3</sub>), 17.9 (s,  $J_{\text{PtC}} = 17$  Hz, P(CH<sub>2</sub>CH<sub>2</sub>CH<sub>3</sub>)<sub>3</sub>), 18.9 (s, CH<sub>3</sub>), 26.1 (t,  $J = 16$  Hz, P(CH<sub>2</sub>CH<sub>2</sub>CH<sub>3</sub>)<sub>3</sub>), 116.9, 128.5, 130.2 (s, NCS), 135.2, 145.1 (s, Ph). The carbon atom of CNR could not be assigned due to its weak intensity.  $\delta_{\text{P}}$  (CDCl<sub>3</sub>) 9.14 (s,  $J_{\text{PtP}} = 1946$  Hz).

**Data for [Pd(CN-*i*-Pr)(SCN)(PEt<sub>3</sub>)<sub>2</sub>](SCN), (14):**  $\nu_{\max}/\text{cm}^{-1}$  2249 (N≡C), 2114, 2057 (NCS);  $\delta_{\text{H}}$  (300 MHz in CDCl<sub>3</sub>) 1.29 (q,  $J = 7.3$  Hz, 18H, P(CH<sub>2</sub>CH<sub>3</sub>)<sub>3</sub>), 1.57 (d,  $J = 6.6$  Hz, 6H, C(CH<sub>3</sub>)<sub>2</sub>), 2.14 (m, 12H, P(CH<sub>2</sub>CH<sub>3</sub>)<sub>3</sub>);  $\delta_{\text{C}}$  (CDCl<sub>3</sub>) 8.31 (s, P(CH<sub>2</sub>CH<sub>3</sub>)<sub>3</sub>), 16.3 (br, P(CH<sub>2</sub>CH<sub>3</sub>)<sub>3</sub>), 22.4 (s, C(CH<sub>3</sub>)<sub>2</sub>), 51.0 (s, C(CH<sub>3</sub>)<sub>2</sub>), 132.0 (br, NCS);  $\delta_{\text{P}}$  (CDCl<sub>3</sub>) 22.6 (s).

**Data for [Pd(CN-C<sub>6</sub>H<sub>3</sub>-2,6-Me<sub>2</sub>)(SCN)(PEt<sub>3</sub>)<sub>2</sub>](SCN), (15):**  $\nu_{\max}/\text{cm}^{-1}$  2196 (N≡C), 2106, 2056 (NCS);  $\delta_{\text{H}}$  (300 MHz in CDCl<sub>3</sub>) 1.26 (q,  $J = 7.3$  Hz, 18H, P(CH<sub>2</sub>CH<sub>3</sub>)<sub>3</sub>), 2.06 (br, 12H, P(CH<sub>2</sub>CH<sub>3</sub>)<sub>3</sub>), 2.49 (s, 6H, CH<sub>3</sub>), 7.13–7.16 (m, 2H, Ph), 7.23–7.28 (m, 1H, Ph);  $\delta_{\text{C}}$  (CDCl<sub>3</sub>) 8.18 (s, P(CH<sub>2</sub>CH<sub>3</sub>)<sub>3</sub>), 15.5 (br, P(CH<sub>2</sub>CH<sub>3</sub>)<sub>3</sub>), 19.0 (s, CH<sub>3</sub>), 128.2, 129.6, 132.5 (br, NCS), 140.0 (s, Ph);  $\delta_{\text{P}}$  (CDCl<sub>3</sub>) 23.3 (s).

**Data for [Pd(CN-C<sub>6</sub>H<sub>3</sub>-2,6-*i*-Pr<sub>2</sub>)<sub>2</sub>(PMe<sub>3</sub>)<sub>2</sub>](SCN)<sub>2</sub>, (16):**  $\nu_{\max}/\text{cm}^{-1}$  2196 (N≡C), 2055 (NCS);  $\delta_{\text{H}}$  (300 MHz in CDCl<sub>3</sub>) 1.32 (d,  $J = 7.9$  Hz, 24H, CH(CH<sub>3</sub>)<sub>2</sub>), 1.82 (s, 18 H, P(CH<sub>3</sub>)<sub>3</sub>), 3.40 (sep,  $J = 6.9$  Hz, 4H, CH(CH<sub>3</sub>)<sub>2</sub>), 7.23 (d,  $J = 7.9$  Hz, Ph), 7.44 (t,  $J = 7.9$  Hz, 2H, Ph);  $\delta_{\text{C}}$  (CDCl<sub>3</sub>) 15.1 (br, P(CH<sub>3</sub>)<sub>3</sub>), 23.1 (s, CH(CH<sub>3</sub>)<sub>2</sub>), 30.0 (s, CH(CH<sub>3</sub>)<sub>2</sub>), 122.2, 123.9, 126.6, 130.0 (s, NCS), 145.8 (s, Ph);  $\delta_{\text{P}}$  (CDCl<sub>3</sub>) -6.59 (s).

**Data for [Pt(CN–C<sub>6</sub>H<sub>3</sub>-2,6-*i*-Pr<sub>2</sub>)<sub>2</sub>(PMe<sub>3</sub>)<sub>2</sub>](SCN)<sub>2</sub>, (17):**  $\nu_{\max}/\text{cm}^{-1}$  2195 (N≡C), 2059 (NCS);  $\delta_{\text{H}}$  (300 MHz in CDCl<sub>3</sub>) 1.34 (d,  $J = 6.8$  Hz, 24H, CH(CH<sub>3</sub>)<sub>2</sub>), 1.82 (s,  $J_{\text{PtH}} = 23$  Hz, 18 H, P(CH<sub>3</sub>)<sub>3</sub>), 3.43 (sep,  $J = 6.8$  Hz, 4H, CH(CH<sub>3</sub>)<sub>2</sub>), 7.28 (d,  $J = 7.8$  Hz, Ph), 7.48 (t,  $J = 7.8$  Hz, 2H, Ph);  $\delta_{\text{C}}$  (CDCl<sub>3</sub>) 15.8 (t,  $J = 19$  Hz, P(CH<sub>3</sub>)<sub>3</sub>), 23.3 (s, CH(CH<sub>3</sub>)<sub>2</sub>), 29.9 (s, CH(CH<sub>3</sub>)<sub>2</sub>), 122.3, 124.1, 130.6 (s, NCS), 131.5, 146.3 (s, Ph);  $\delta_{\text{P}}$  (CDCl<sub>3</sub>) – 21.0 (s,  $J_{\text{PtP}} = 1960$  Hz).

**Data for Ni(CN–C<sub>6</sub>H<sub>3</sub>-2,6-*i*-Pr<sub>2</sub>)(NCS)<sub>2</sub>(PMe<sub>3</sub>)<sub>2</sub>, 18:**  $\nu_{\max}/\text{cm}^{-1}$  2163 (N≡C), 2102, 2047 (NCS);  $\delta_{\text{H}}$  (300 MHz in CDCl<sub>3</sub>) 1.31 (d,  $J = 6.8$  Hz, 12H, CH(CH<sub>3</sub>)<sub>2</sub>), 1.56 (s, 18 H, P(CH<sub>3</sub>)<sub>3</sub>), 3.38 (sep,  $J = 6.8$  Hz, 2H, CH(CH<sub>3</sub>)<sub>2</sub>), 7.24 (d,  $J = 7.7$  Hz, 2H, Ph), 7.42 (t,  $J = 7.9$  Hz, 1H, Ph);  $\delta_{\text{C}}$  (CDCl<sub>3</sub>) 14.5 (t,  $J = 16$  Hz, P(CH<sub>3</sub>)<sub>3</sub>), 23.3 (s, CH(CH<sub>3</sub>)<sub>2</sub>), 30.0 (s, CH(CH<sub>3</sub>)<sub>2</sub>), 123.0, 124.0, 130.5, 133.9 (s, NCS), 145.6 (s, Ph);  $\delta_{\text{P}}$  (CDCl<sub>3</sub>) 10.6 (s).

**Data for Pt(NCS)<sub>2</sub>(depe);**  $\nu_{\max}/\text{cm}^{-1}$  2125, 2098, 2056 (NCS);  $\delta_{\text{H}}$  (300 MHz in DMSO-d<sub>6</sub>) 1.20 (m, 12H, –P(CH<sub>2</sub>CH<sub>3</sub>)<sub>2</sub>), 2.01–2.30 (m, 12 H, –P(CH<sub>2</sub>CH<sub>3</sub>)<sub>2</sub>);  $\delta_{\text{P}}$  (DMSO-d<sub>6</sub>) 50.5 (bd,  $J = 142$  Hz,  $J_{\text{PtP}} = 3377$  Hz), 63.3 (s,  $J_{\text{PtP}} = 3076$  Hz), 63.6 (s,  $J_{\text{PtP}} = 3034$  Hz).

**Data for [Pt(depe)<sub>2</sub>](SCN)<sub>2</sub>, (19):** IR (KBr, cm<sup>-1</sup>):  $\nu_{\text{max}}/\text{cm}^{-1}$  2052 (NCS);  $\delta_{\text{H}}$  (300 MHz in DMSO-d<sub>6</sub>) 1.11 (m, 12H, -P(CH<sub>2</sub>CH<sub>3</sub>)<sub>2</sub>), 2.10-2.50 (m, 12 H, -P(CH<sub>2</sub>CH<sub>3</sub>)<sub>2</sub>);  $\delta_{\text{P}}$  (DMSO-d<sub>6</sub>) 58.3 (s,  $J_{\text{PtP}} = 2124$  Hz).
